# Supplementary material for: Combined targeting of PI3K and MEK effector pathways via CED for DIPG therapy
Source: PubMed Central journal article supplement (PMC7212917; doi:10.1093/noajnl/vdz004), 2019-05-28
Supplement: vdz004_suppl_supplementary_figures.pdf [file vdz004_suppl_supplementary_figures.pdf]

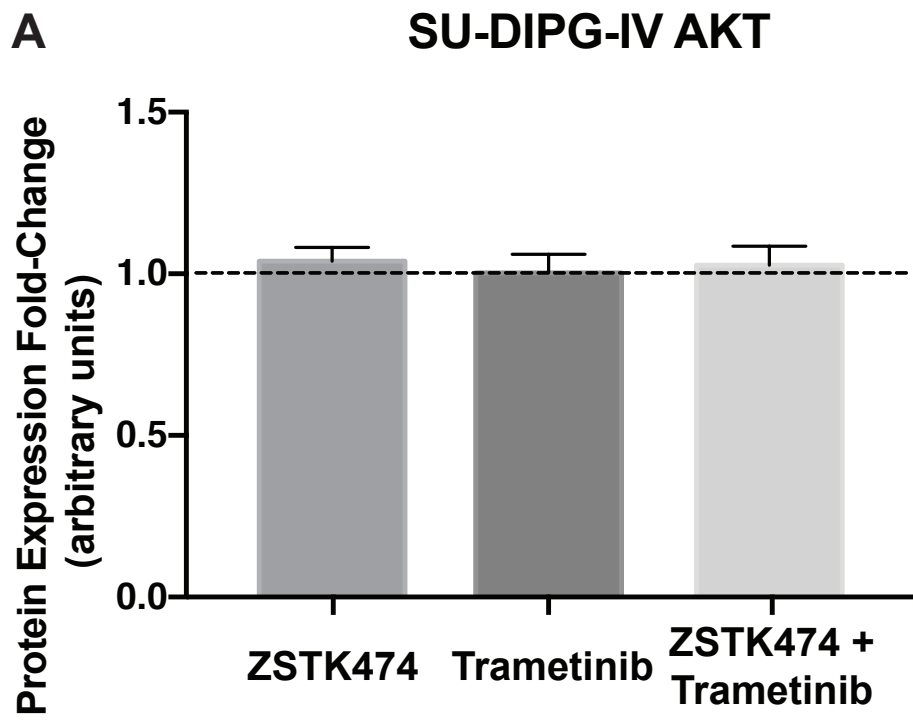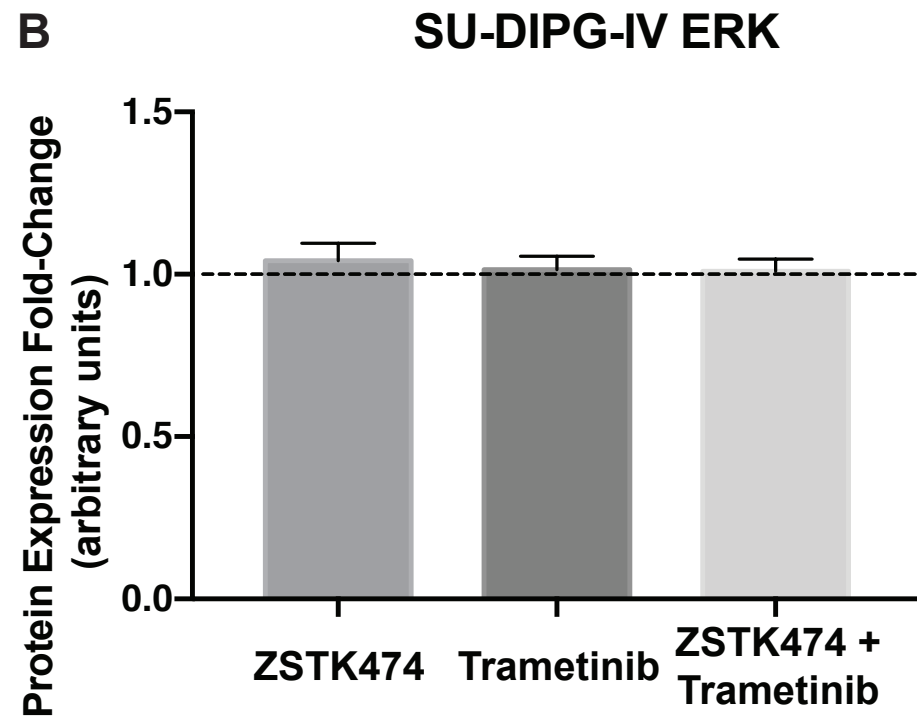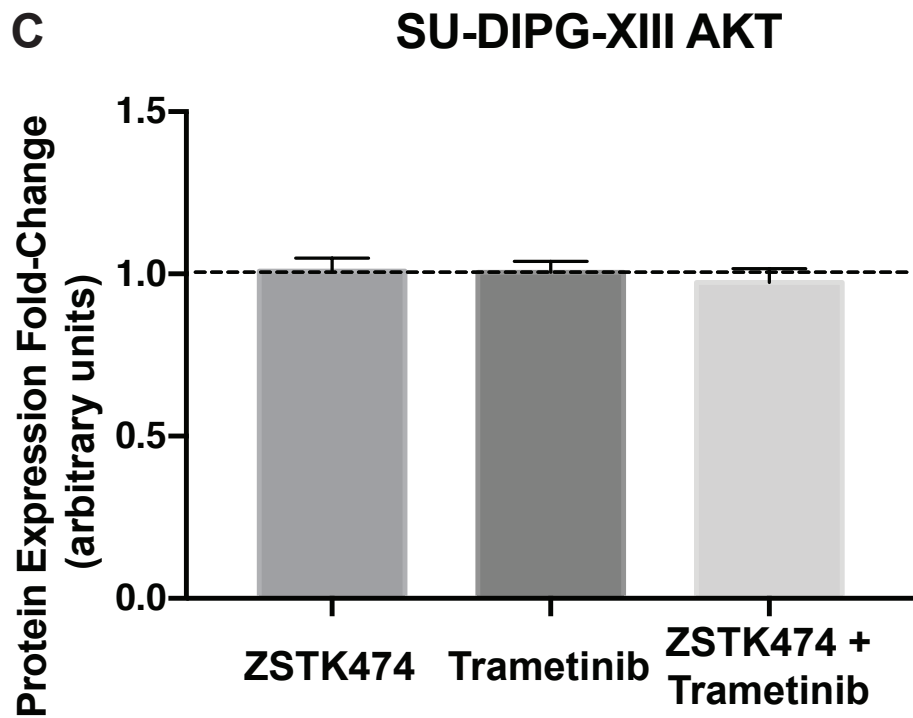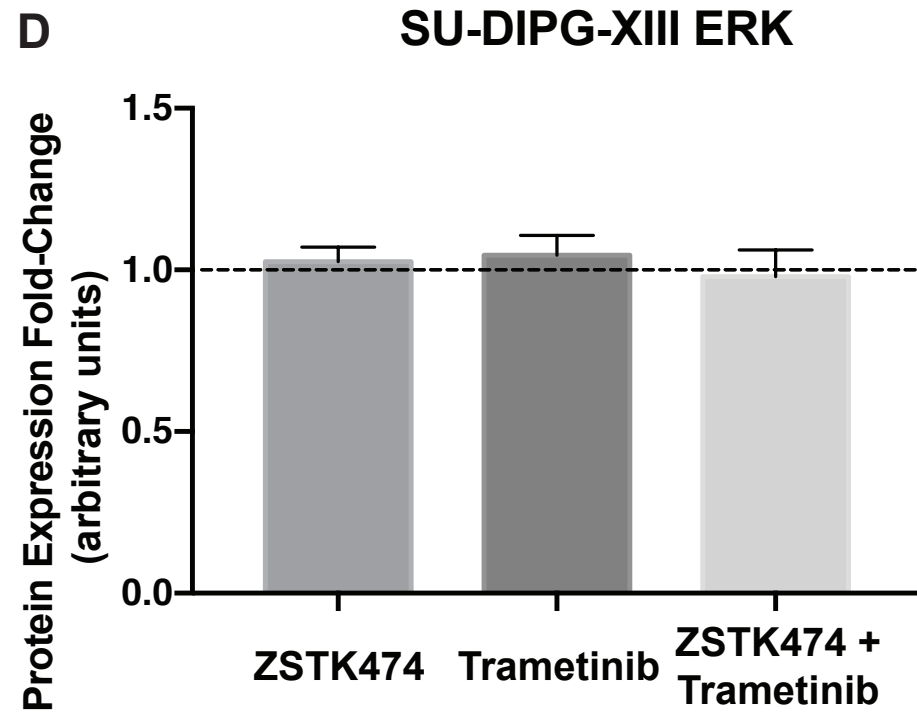

**A****Pre-Treatment**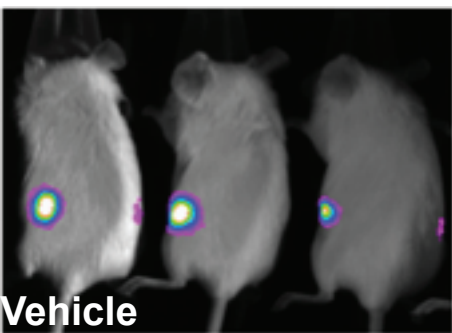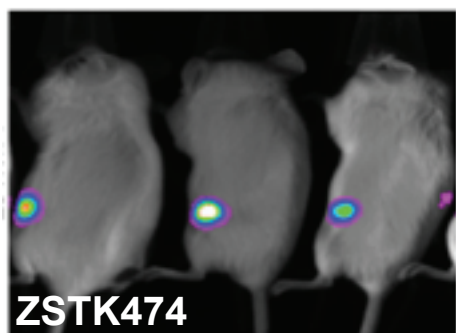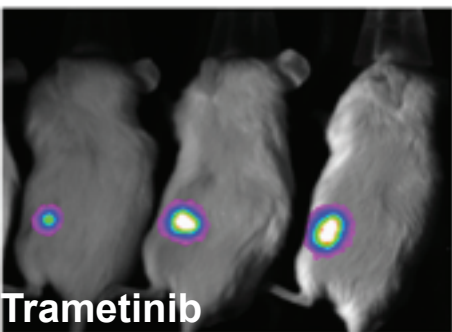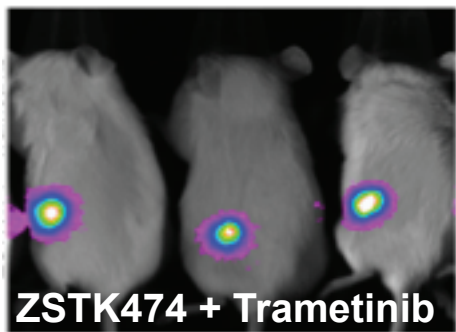**B****Post-Treatment**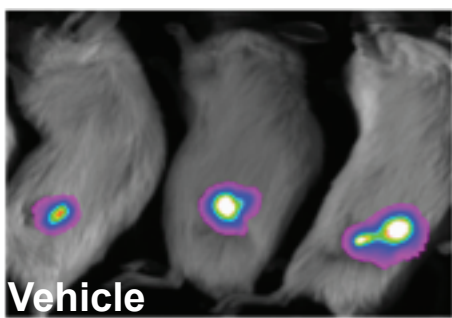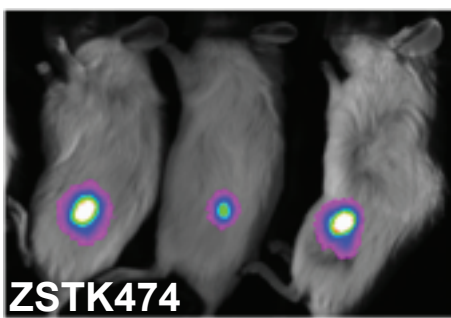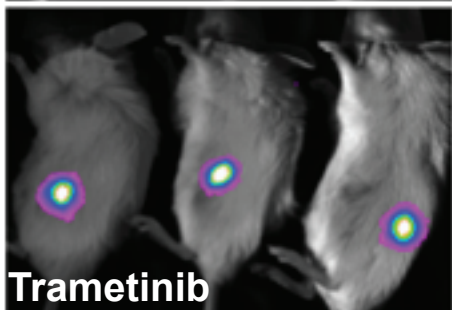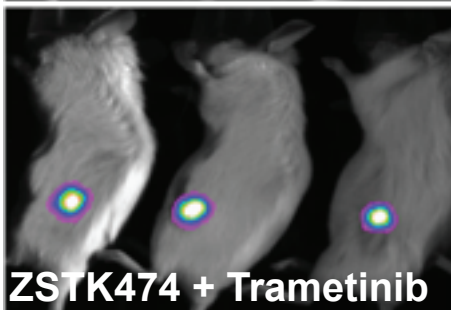**Supplementary Figure 2**

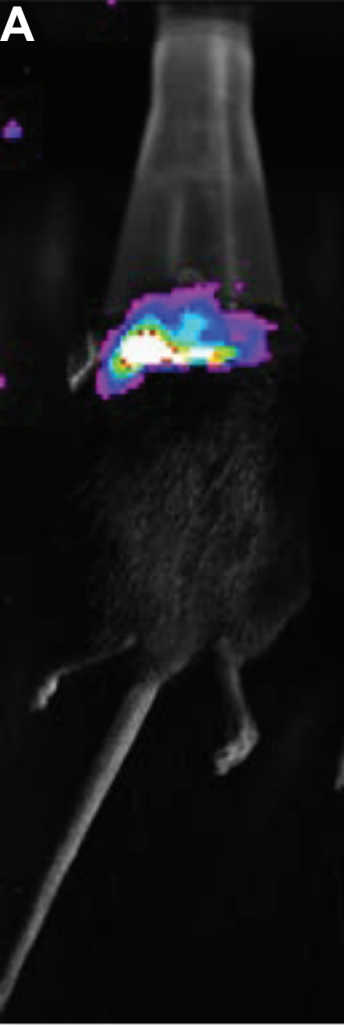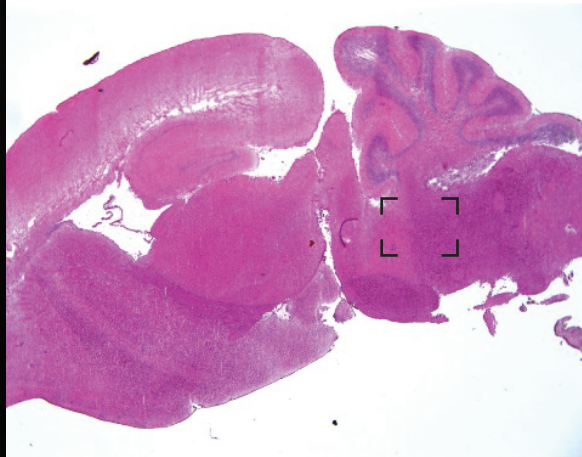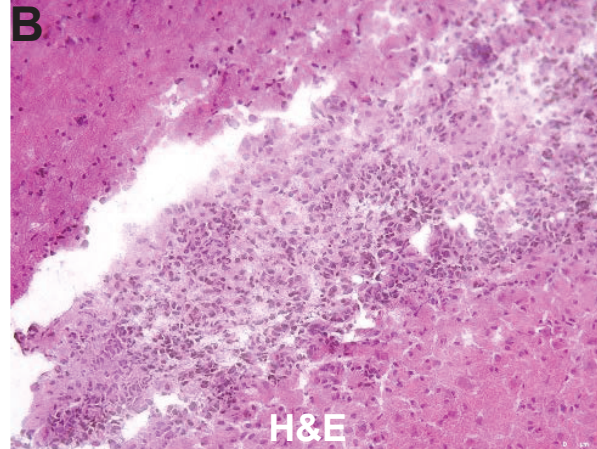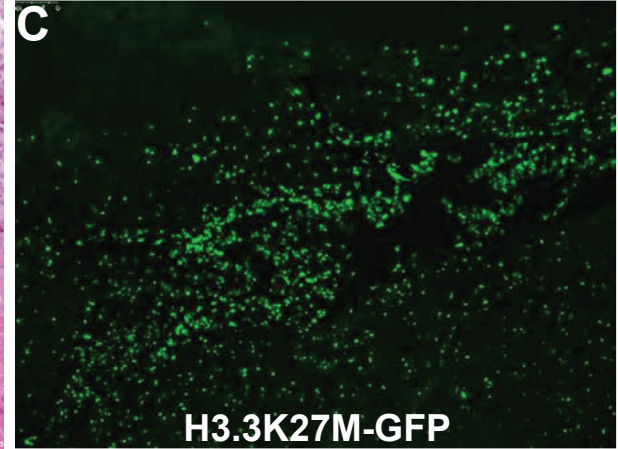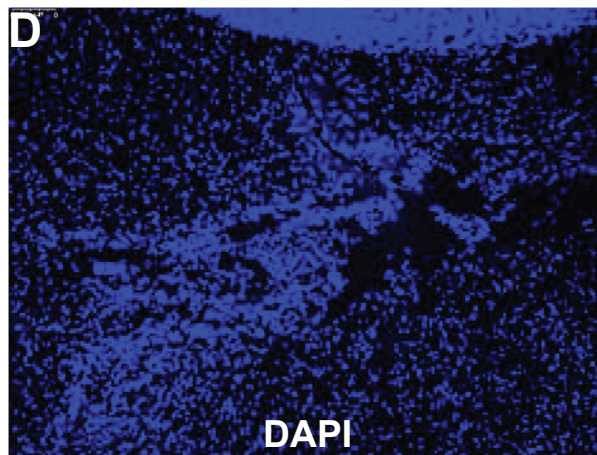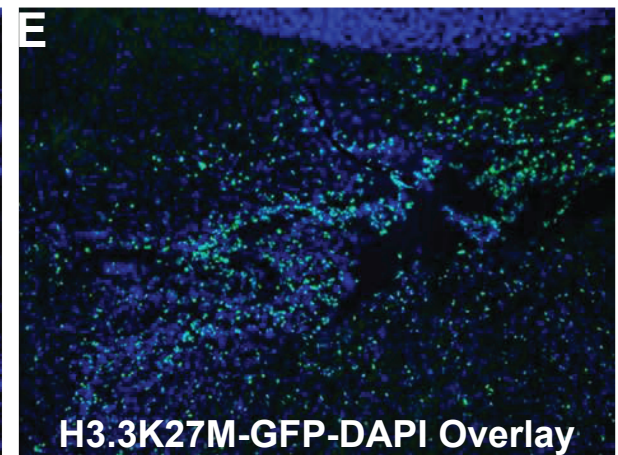

Supplementary Figure 3



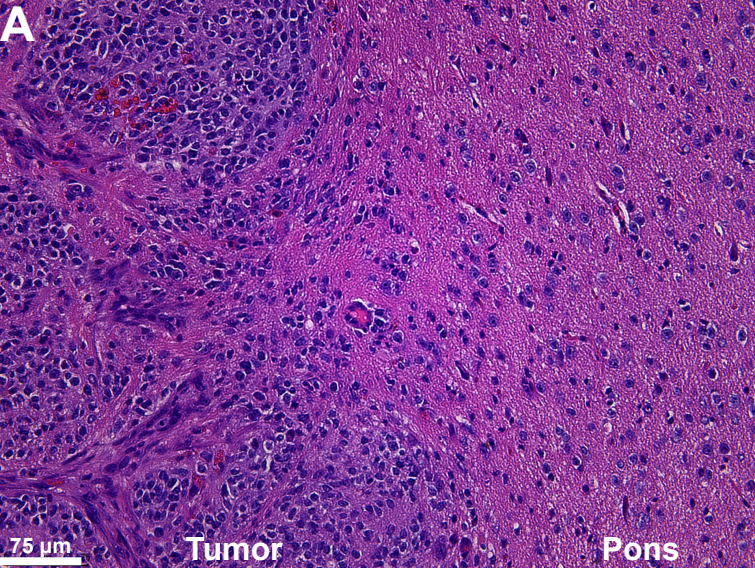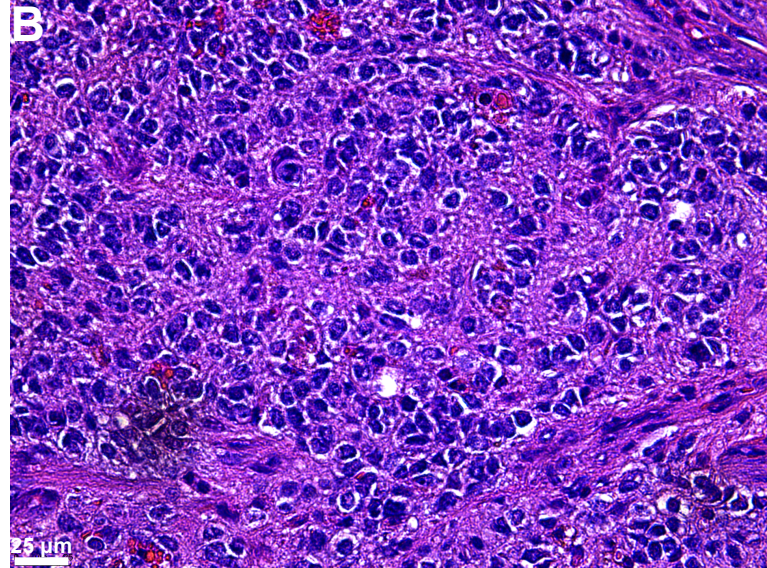

**Supplementary Figure 4**
